# Supplementary material for: Epigenetic regulation of the nuclear-coded GCAT and SHMT2 genes confers human age-associated mitochondrial respiration defects
Source: PubMed Central journal article supplement (PMC5377050; doi:10.1038/srep10434), 2015-05-22
Supplement: srep10434-s1.pdf [file srep10434-s1.pdf]

**Supplementary Information for**

Epigenetic regulation of the nuclear-coded *GCAT* and *SHMT2* genes confers human age-associated mitochondrial respiration defects

Osamu Hashizume, Sakiko Ohnishi, Takayuki Mito, Akinori Shimizu, Kaori Ishikawa, Kazuto Nakada, Manabu Soda, Hiroyuki Mano, Sumie Togayachi, Hiroyuki Miyoshi, Keisuke Okita & Jun-Ichi Hayashi

### **Supplementary figure legends**

**Supplementary Figure 1.** Effects of aging on mtDNA copy number and morphology of mitochondria. (a) Comparison of mtDNA copy number between young and elderly groups. The young group (black bars) consisted of the fibroblast lines TIG3S (fetus), TIG121 (age 8 months), TIG120 (6 years), and TIG118 (12 years). The elderly group (open bars) consisted of TIG106 (80 years), TIG107 (81 years), TIG101 (86 years), and TIG102 (97 years). 'Average' indicates the average mtDNA copy number of four fibroblast lines. (b) Comparison of mitochondrial morphologies. Fibroblasts were treated with Mitotracker Red to stain mitochondria and 4',6-diamidino-2-phenylindole (DAPI) to stain nuclei. The higher intensity of mitochondrial staining with Mitotracker Red reflects the higher membrane potential and higher respiratory function in TIG3S (fetus) than in TIG107 (81 years). Bars, 20  $\mu\text{m}$ .

**Supplementary Figure 2.** Quantitative estimation of mutation frequency at each nucleotide position of mtDNA from eight fibroblast lines by deep sequence analysis. Red and blue dots represent the frequencies of mutations at each nucleotide position of mtDNA from the young group and the elderly group, respectively. Graphs show mutation frequency versus mutation frequency rank. A higher rank represents a higher frequency of the mutation at each nucleotide position. The young group consists of TIG3S (fetus), TIG121 (8 months), TIG120 (6 years), and TIG118 (12 years). The elderly group consists of TIG106 (80 years), TIG107 (81 years), TIG101 (86 years), and TIG102 (97 years).

**Supplementary Figure 3.** Characterization of human induced pluripotent stem cells isolated from the fibroblast lines TIG3S (fetus), TIG121 (age 8 months), TIG107 (81 years), and TIG102 (97 years). (a) Small colonies with flat embryonic-stem-cell-like morphology were obtained about 4 weeks after transfection with the gene set *OCT3/4*, *SOX2*, *KFL4*, *L-MYC*, *LIN28*, and *p53shRNA*. (b) Examination of pluripotency marker genes by using antibodies to Nanog, TRA-1-60, and SSEA4. Expression of Nanog is shown in red (Alexa Fluor 488), and that of TRA-1-60 or SSEA4 is shown in green (Alexa Fluor 594). Bars, 100  $\mu\text{m}$ .

**Supplementary Figure 4.** Selection of six nuclear-coded genes associated with age-associated mitochondrial respiration defects in human fibroblasts. (a) Schematic representation of the process of selection of nuclear-coded genes. From 27,958 genes on the microarray, 1446 genes were selected by using the gene ontology (GO) term 'mitochondria'. From those 1446 genes, 144, 28, 128, and 71 genes were selected by using the GO terms 'respiration', 'aging', 'translation', and 'amino acids', respectively. Finally, six genes that were commonly more than 1.5-fold upregulated or downregulated in fibroblast lines from elderly subjects were selected by microarray analysis (solid lines). To examine aging phenotypes other than mitochondrial respiration defects, we used the GO terms 'aging' and 'autophagy'. We then searched for genes that were commonly more than 1.5-fold upregulated or downregulated in fibroblast lines from elderly subjects (broken lines). No genes were selected in this part of the

microarray analysis. (b) Heatmaps depicting transcripts of genes associated with respiration, aging, translation, and amino acids in mitochondria. Values represent  $\log_2$  ratios of the average array signals of TIG107 and TIG102 compared with those of TIG3S and TIG121 (TIG107/TIG3S, TIG102/TIG3S, TIG107/TIG121 and TIG102/TIG121). Genes down- and upregulated in the fibroblast lines from elderly subjects (TIG107 and TIG102) are shown in red and green, respectively.

**Supplementary Figure 5.** Comparison of mRNA levels of the candidate six genes in the young and elderly groups. The six gene candidates for regulation of age-associated respiration defects were selected by using gene ontology terms and a microarray heatmap (Supplementary Fig. 4b). The young group consisted of fibroblast lines TIG3S (fetus), TIG121 (age 8 months), TIG120 (6 years), and TIG118 (12 years). The elderly group consisted of lines TIG106 (80 years), TIG107 (81 years), TIG101 (86 years), and TIG102 (97 years). Levels of transcripts were normalized against UBC expression. Of the six genes examined, age-associated regulation was confirmed to be present in MRPL28, EHHADH, and GCAT.

**Supplementary Figure 6.** Effects of glycine treatment on the mitochondrial respiratory function of TIG102.

Glycine (140  $\mu\text{M}$ ) was included in the medium for 10 days before the estimation of  $\text{O}_2$  consumption rates. Experiments were performed in triplicate; error bars indicate  $\pm$  SD.

\* $P < 0.05$ .

# Supplementary Figure 1

**a**

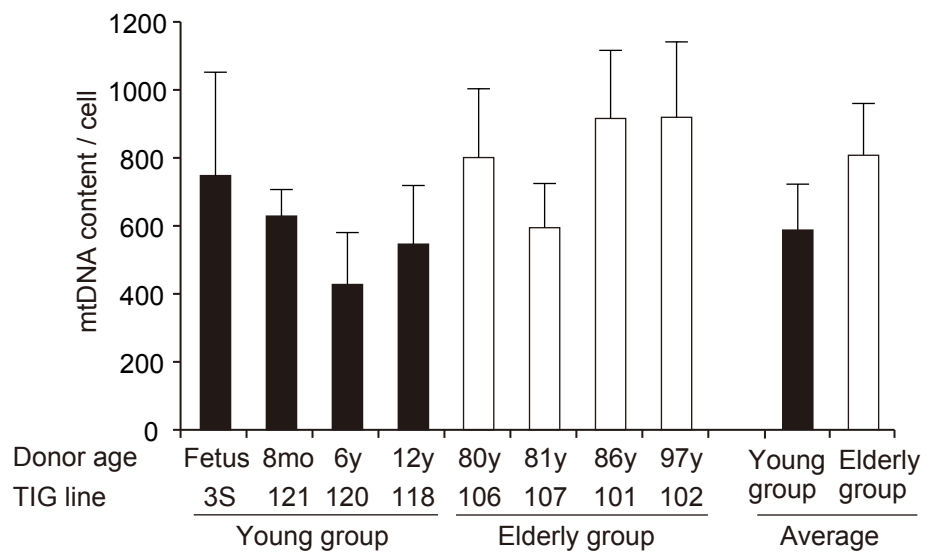

**b**

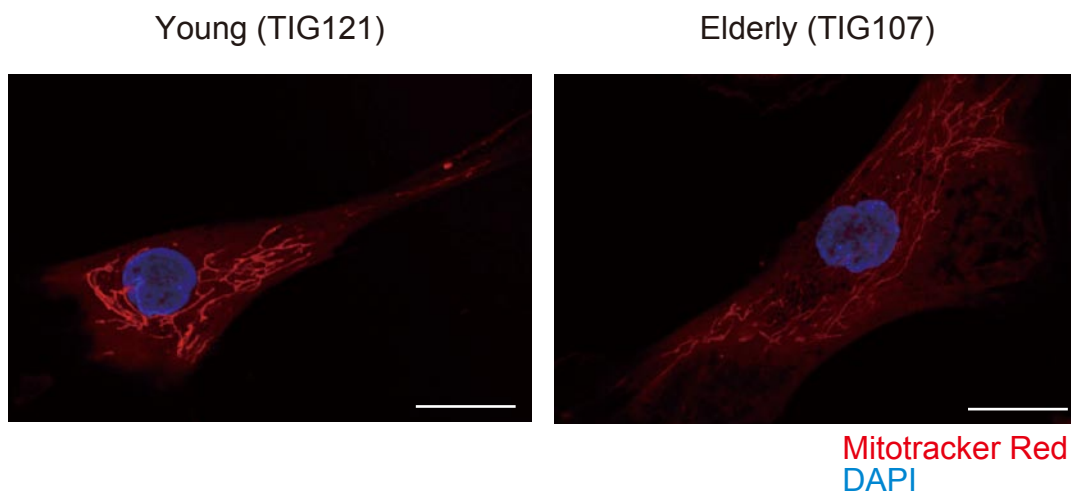

Supplementary Figure 2

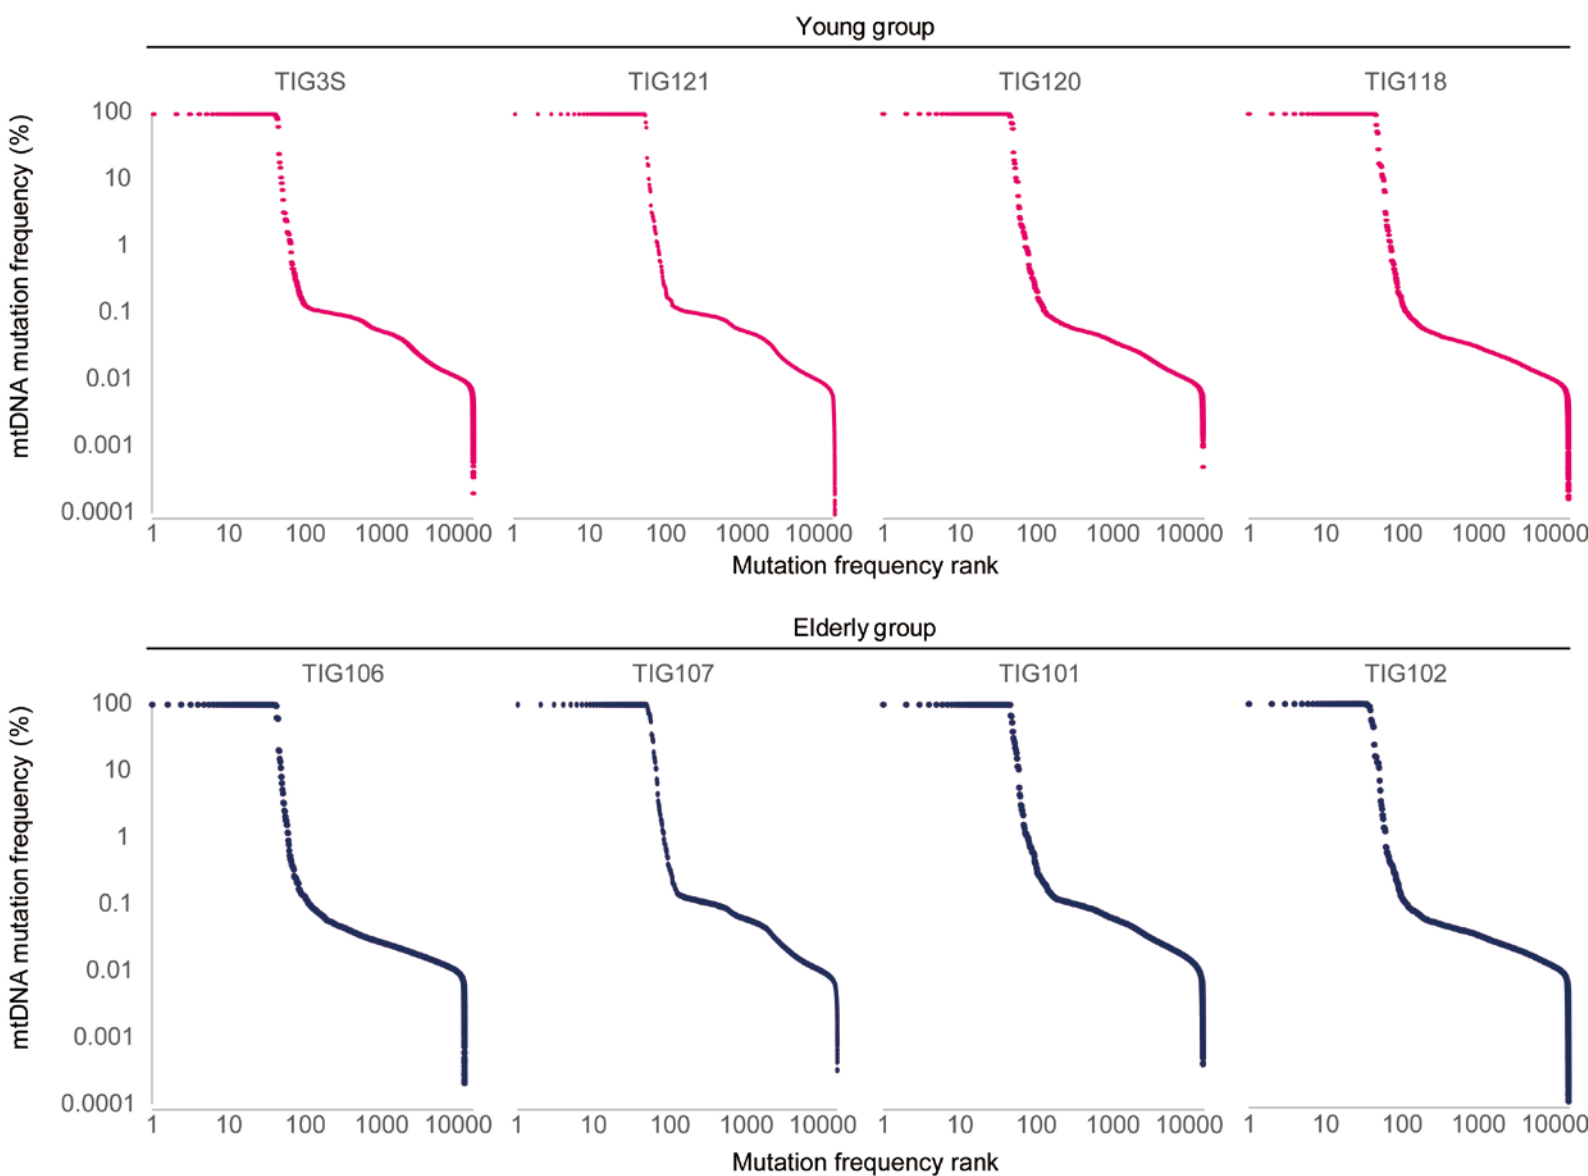

# Supplementary Figure 3

**a**

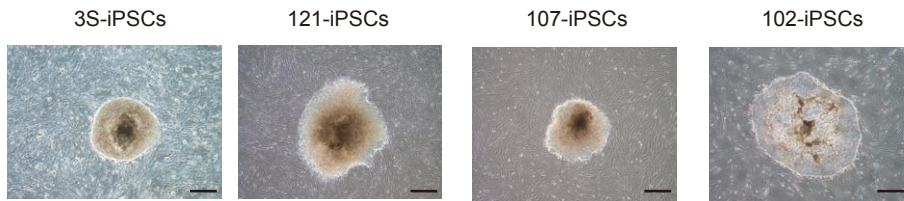

**b**

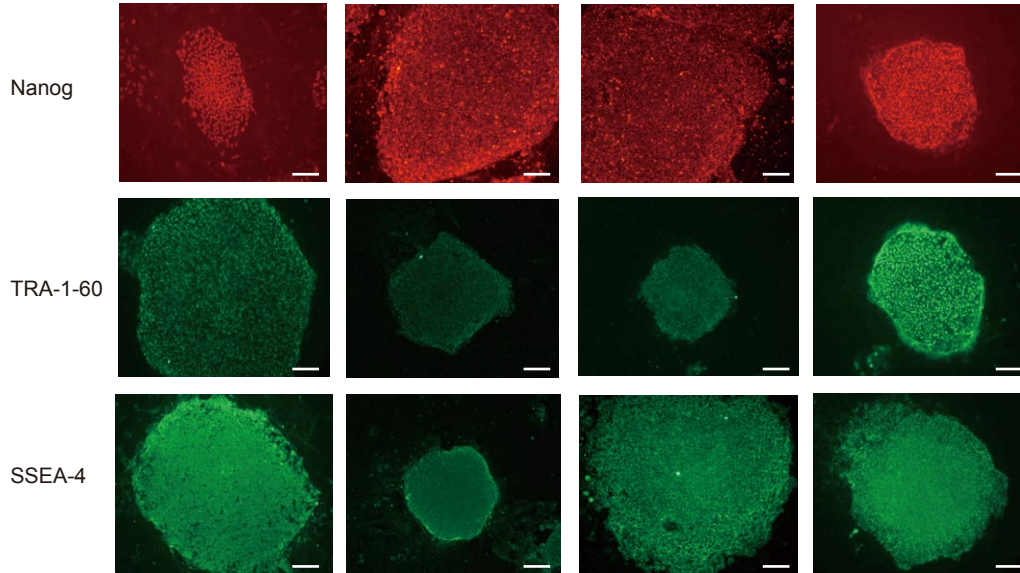

# Supplementary Figure 4

**a**

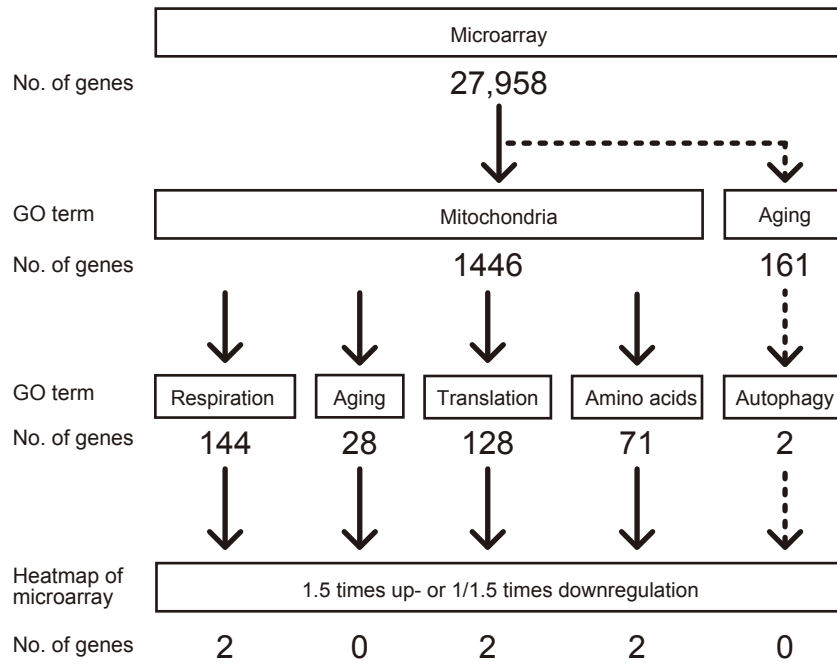



**b**

## Gene ontology terms

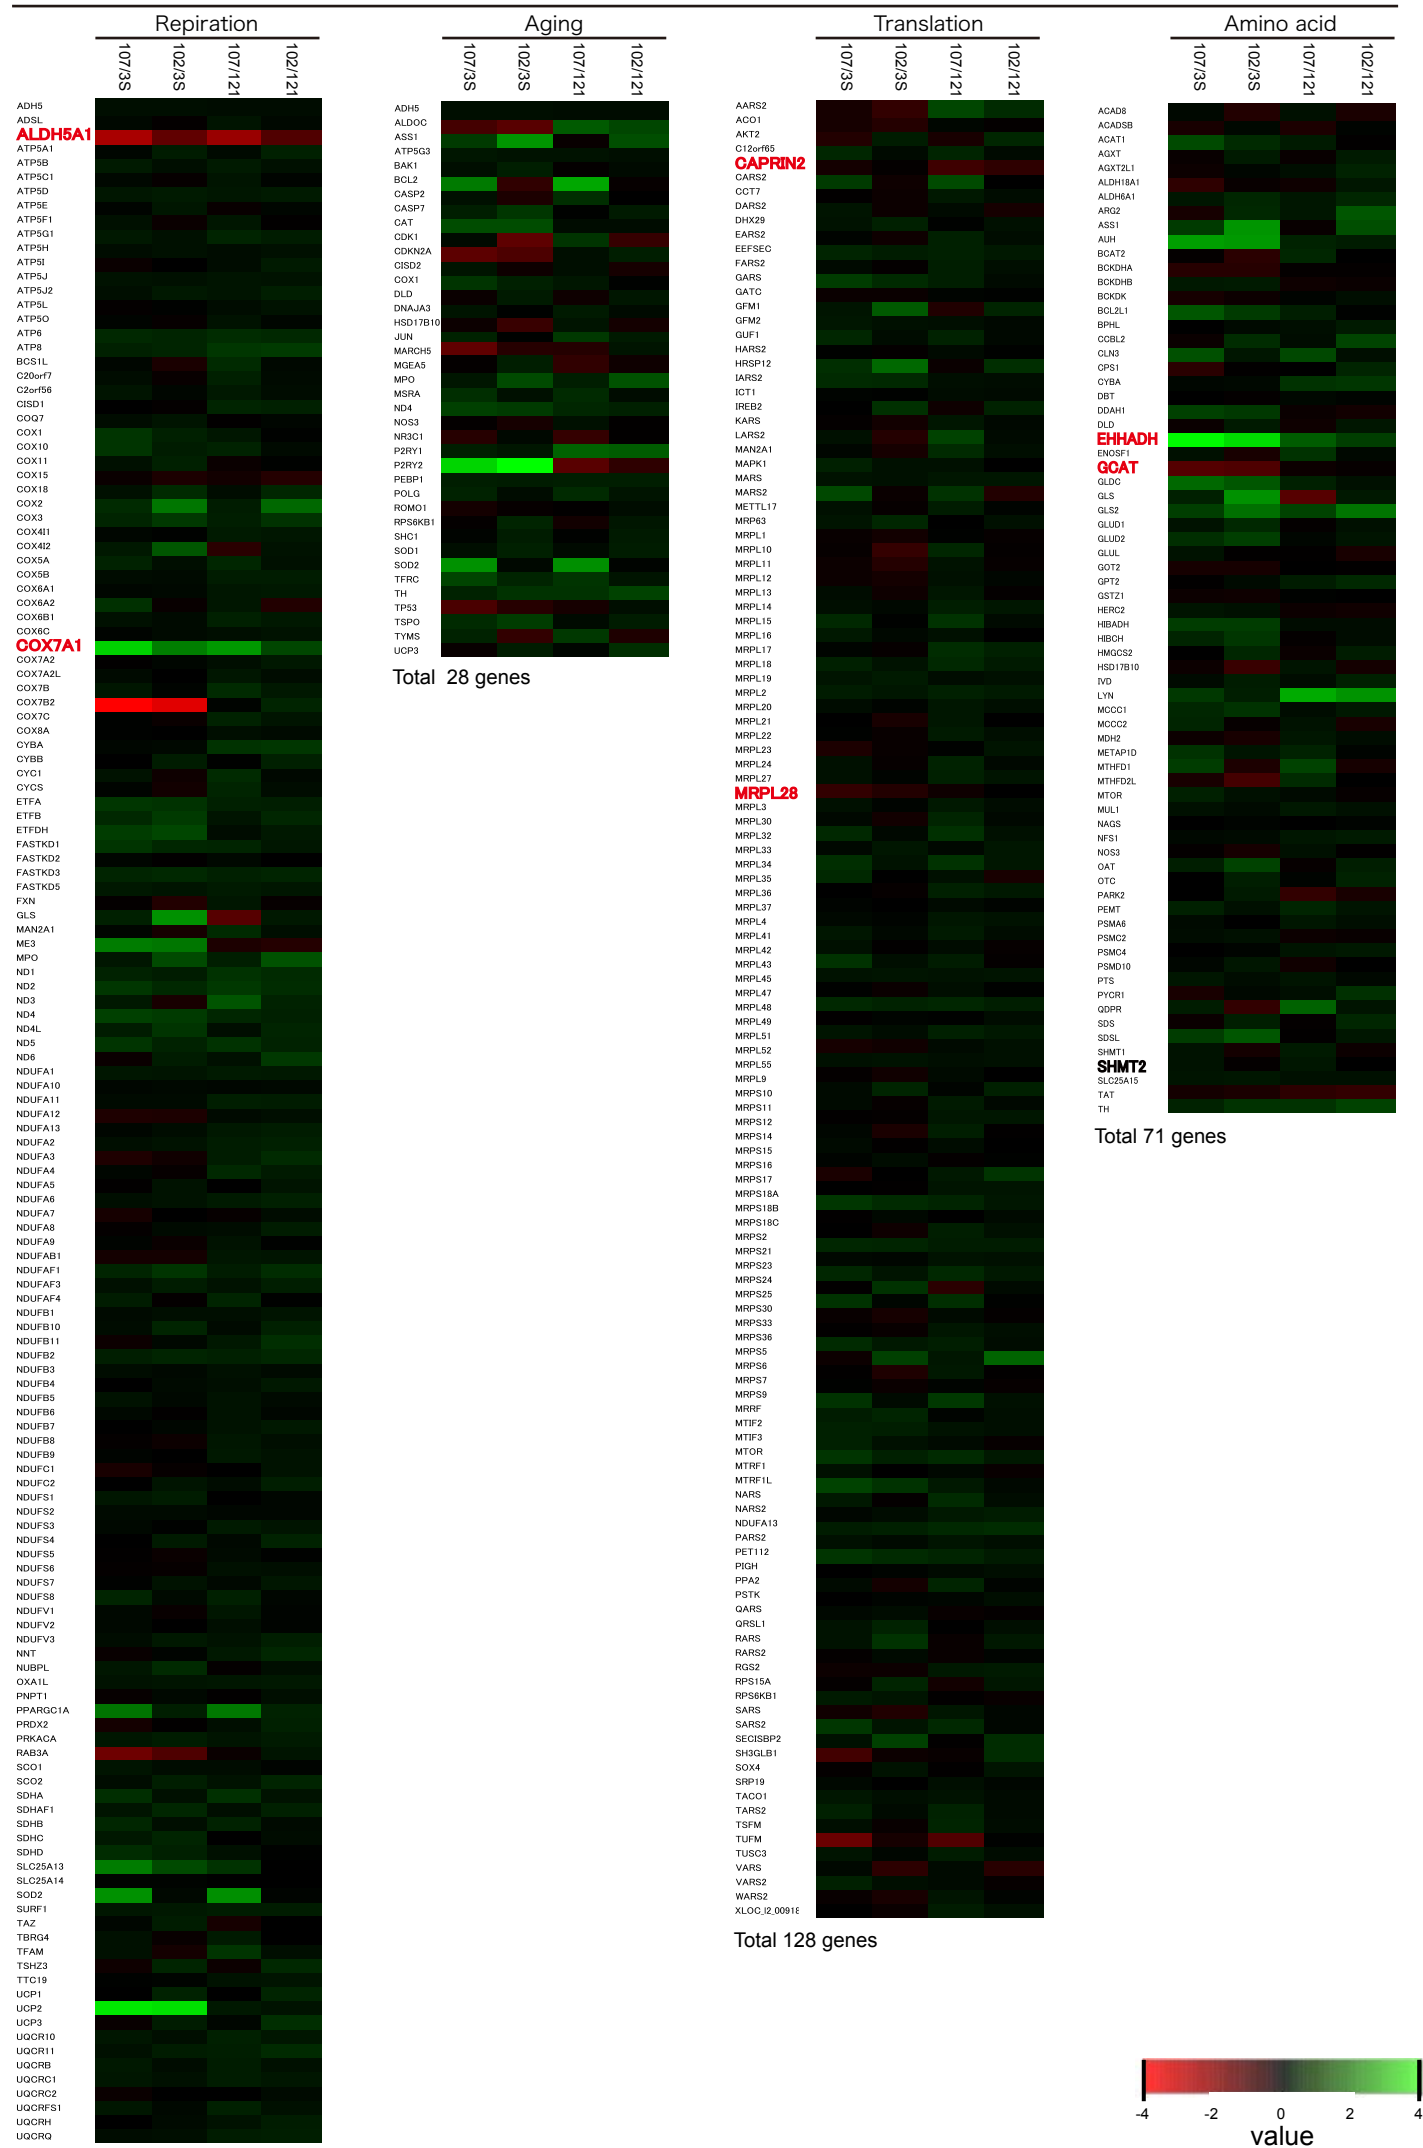

Supplementary Figure 5

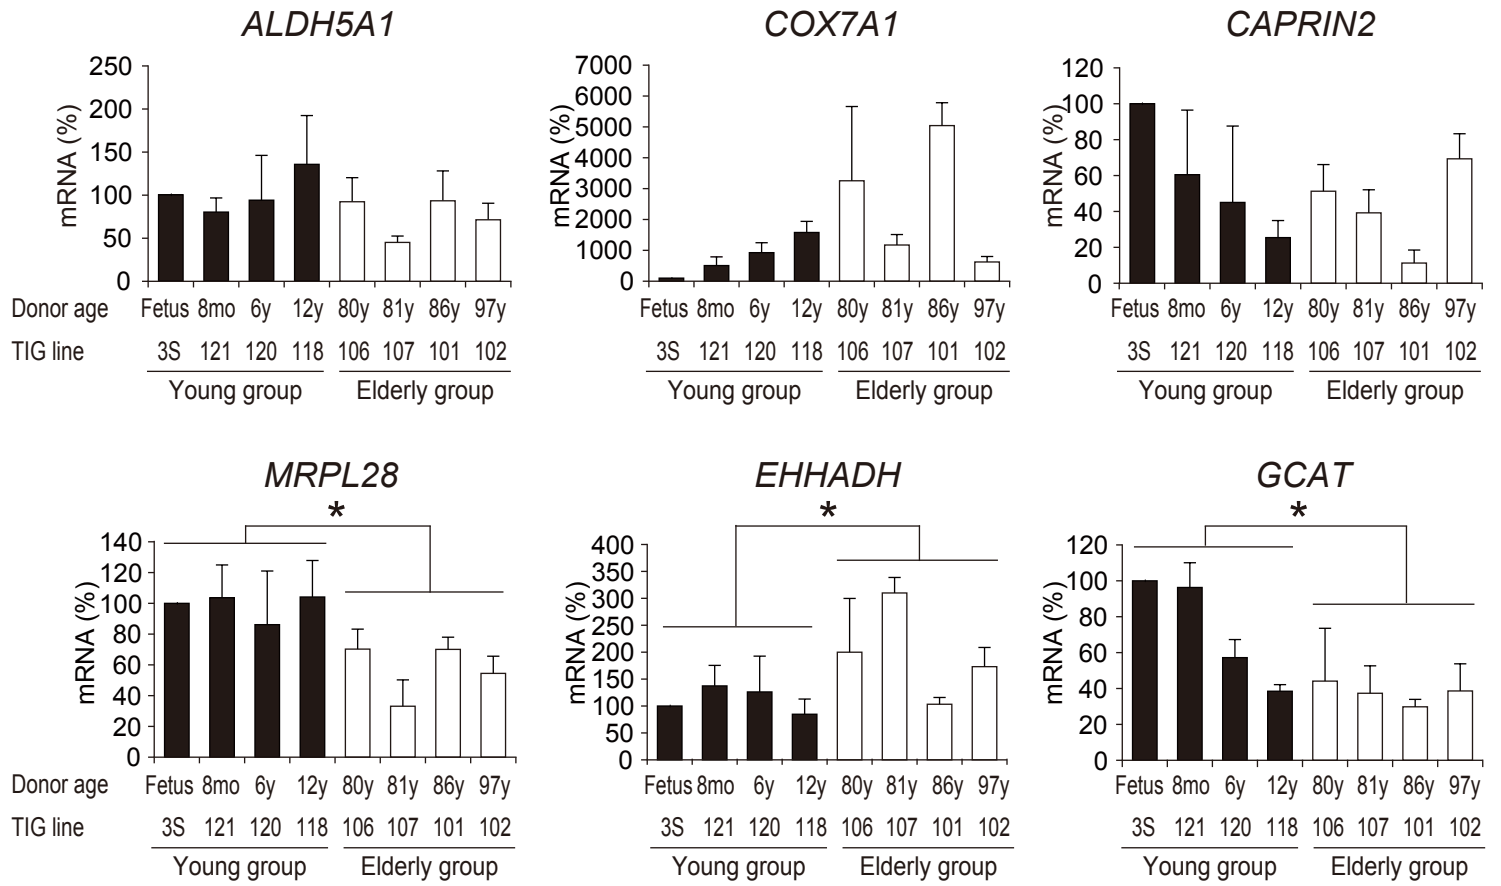

Supplementary Figure 6

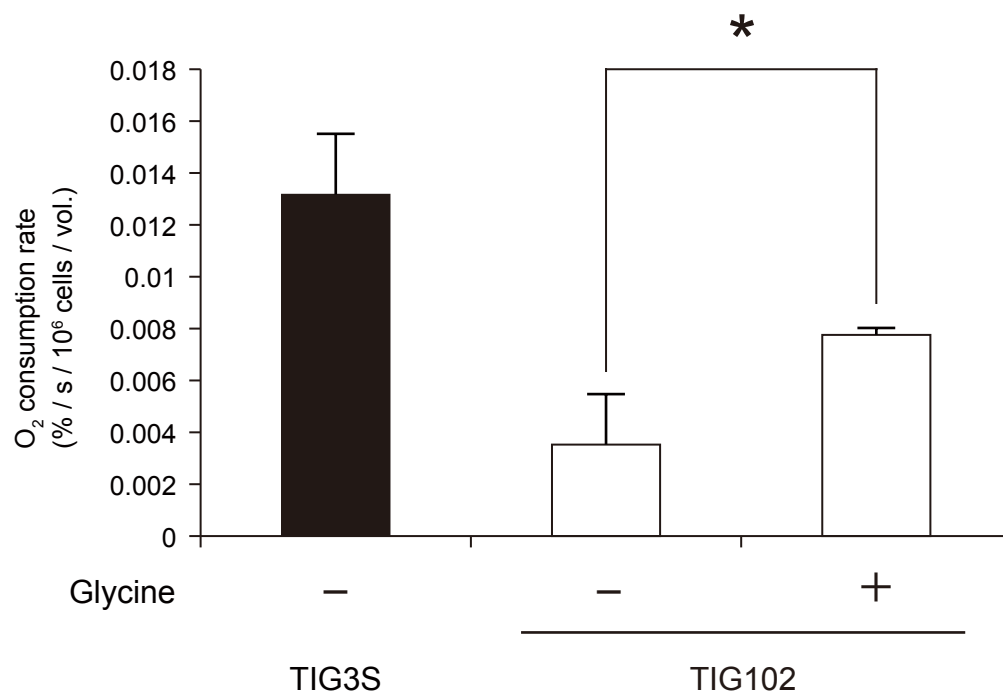

Table S1. Characterization of the frequent mutations existing in more than 90% mtDNA revealed by the deep sequence analysis of eight fibroblast lines.

| Human fibroblast lines | Position <sup>a</sup> | Gene      | Ref <sup>a</sup> | Alteration | Related disease <sup>b</sup> | Total read number | Alteration read number | Alteration ratio (%) | Indel type | Amino acid change |
|------------------------|-----------------------|-----------|------------------|------------|------------------------------|-------------------|------------------------|----------------------|------------|-------------------|
| TIG3S                  | 103                   | D-loop    | A                | G          | polymorphism                 | 989611            | 989349                 | 99.9608              | -          | -                 |
| (fetus)                | 199                   |           | C                | T          | polymorphism                 | 448971            | 448801                 | 99.9485              | -          | -                 |
|                        | 204                   |           | C                | T          | polymorphism                 | 479987            | 479793                 | 99.9548              | -          | -                 |
|                        | 235                   |           | A                | G          | polymorphism                 | 193956            | 193791                 | 99.9056              | -          | -                 |
|                        | 660                   | RNR1      | A                | G          | polymorphism                 | 987308            | 987028                 | 99.945               | -          | -                 |
|                        | 706                   |           | A                | G          | polymorphism                 | 993523            | 993174                 | 99.9582              | -          | -                 |
|                        | 951                   |           | C                | CA         | polymorphism                 | 999511            | 914384                 | 91.4831              | 1-ins      | -                 |
|                        | 1594                  |           | A                | G          | polymorphism                 | 986159            | 985913                 | 99.9562              | -          | -                 |
|                        | 1732                  | RNR2      | A                | G          | polymorphism                 | 987965            | 987835                 | 99.974               | -          | -                 |
|                        | 2146                  |           | T                | TA         | polymorphism                 | 992672            | 921618                 | 92.8421              | 1-ins      | -                 |
|                        | 4243                  | ND1       | T                | C          | polymorphism                 | 988320            | 987689                 | 99.9188              | -          | -                 |
|                        | 4650                  | ND2       | G                | A          | polymorphism                 | 988665            | 988501                 | 99.9764              | -          | -                 |
|                        | 4819                  |           | A                | G          | polymorphism                 | 982588            | 982073                 | 99.9334              | -          | T-A               |
|                        | 6570                  | COX1      | A                | AG         | polymorphism                 | 907920            | 838304                 | 92.3324              | 1-ins      | -                 |
|                        | 8548                  | ATP8/ATP6 | A                | G          | polymorphism                 | 779011            | 778469                 | 99.9173              | -          | T-A<br>(ATP6)     |
|                        | 8569                  | ATP6      | A                | G          | polymorphism                 | 779299            | 778962                 | 99.942               | -          | -                 |
|                        | 8769                  |           | G                | A          | polymorphism                 | 482303            | 482194                 | 99.9677              | -          | -                 |
|                        | 8779                  |           | C                | T          | polymorphism                 | 481057            | 480879                 | 99.9555              | -          | H-Y               |
|                        | 8814                  |           | T                | C          | polymorphism                 | 453667            | 453547                 | 99.9343              | -          | -                 |
|                        | 9525                  | COX3      | C                | T          | polymorphism                 | 990849            | 990737                 | 99.9771              | -          | -                 |
|                        | 9935                  |           | C                | T          | polymorphism                 | 987933            | 987799                 | 99.9761              | -          | -                 |
|                        | 10383                 | ND3       | G                | A          | polymorphism                 | 988254            | 988089                 | 99.9767              | -          | -                 |
|                        | 11131                 | ND4       | T                | C          | polymorphism                 | 986472            | 986334                 | 99.9285              | -          | -                 |
|                        | 11521                 |           | C                | T          | polymorphism                 | 991976            | 991782                 | 99.9626              | -          | -                 |
|                        | 11632                 |           | C                | T          | polymorphism                 | 992308            | 933903                 | 94.1044              | -          | -                 |
|                        | 11899                 |           | A                | G          | polymorphism                 | 993864            | 992982                 | 99.9026              | -          | -                 |
|                        | 12177                 | TRNH      | A                | G          | polymorphism                 | 989387            | 989033                 | 99.9514              | -          | -                 |
|                        | 12346                 | ND5       | G                | A          | polymorphism                 | 986936            | 986789                 | 99.975               | -          | -                 |
|                        | 12690                 |           | C                | T          | polymorphism                 | 989901            | 989710                 | 99.9654              | -          | -                 |
|                        | 14079                 |           | T                | C          | polymorphism                 | 983826            | 983702                 | 99.9655              | -          | -                 |
|                        | 14455                 | ND6       | C                | T          | polymorphism                 | 932595            | 932454                 | 99.9725              | -          | -                 |
|                        | 14751                 | CYTB      | C                | T          | polymorphism                 | 889483            | 889224                 | 99.96                | -          | T-I               |
|                        | 15208                 |           | T                | C          | polymorphism                 | 985048            | 984884                 | 99.9677              | -          | -                 |
|                        | 15493                 |           | T                | C          | polymorphism                 | 936525            | 936387                 | 99.9706              | -          | -                 |
|                        | 15647                 |           | G                | A          | polymorphism                 | 986318            | 986212                 | 99.9805              | -          | I-V               |
|                        | 15836                 |           | G                | A          | polymorphism                 | 991624            | 991515                 | 99.983               | -          | I-V               |

|       |        |   |   |              |        |        |         |   |   |
|-------|--------|---|---|--------------|--------|--------|---------|---|---|
| 15912 | TRNT   | A | G | polymorphism | 992369 | 992078 | 99.9128 | - | - |
| 16125 | D-loop | C | T | polymorphism | 394184 | 394144 | 99.9827 | - | - |
| 16172 |        | C | T | polymorphism | 273    | 272    | 99.6337 | - | - |
| 16174 |        | C | T | polymorphism | 1191   | 1085   | 91.0999 | - | - |
| 16228 |        | C | T | polymorphism | 26986  | 26786  | 99.2552 | - | - |
| 16250 |        | G | A | polymorphism | 26421  | 26270  | 99.4247 | - | - |
| 16275 |        | C | T | polymorphism | 513353 | 513218 | 99.9601 | - | - |
| 16303 |        | T | A | polymorphism | 999765 | 999669 | 99.9802 | - | - |
| 16504 |        | C | T | polymorphism | 356511 | 356394 | 99.9512 | - | - |

total numbers of alterations

45

|        |       |        |   |    |              |        |        |         |       |     |
|--------|-------|--------|---|----|--------------|--------|--------|---------|-------|-----|
| TIG121 | 103   | D-loop | A | G  | polymorphism | 940020 | 939710 | 99.9522 | -     | -   |
| (8m)   | 152   |        | T | C  | polymorphism | 247388 | 247174 | 99.7797 | -     | -   |
|        | 199   |        | C | T  | polymorphism | 732147 | 731982 | 99.9638 | -     | -   |
|        | 204   |        | C | T  | polymorphism | 819782 | 819624 | 99.9756 | -     | -   |
|        | 488   |        | T | C  | polymorphism | 629931 | 629833 | 99.977  | -     | -   |
|        | 564   |        | A | AC | polymorphism | 724031 | 652264 | 90.0879 | 1-ins | -   |
|        | 706   | RNR1   | A | G  | polymorphism | 993785 | 993336 | 99.9467 | -     | -   |
|        | 951   |        | C | CA | polymorphism | 999434 | 920561 | 92.1082 | 1-ins | -   |
|        | 1594  |        | A | G  | polymorphism | 986920 | 986643 | 99.9547 | -     | -   |
|        | 2242  | RNR2   | A | G  | polymorphism | 981446 | 981305 | 99.9715 | -     | -   |
|        | 3006  |        | G | A  | polymorphism | 989735 | 989603 | 99.9784 | -     | -   |
|        | 4878  | ND2    | C | T  | polymorphism | 993953 | 955904 | 96.1541 | -     | -   |
|        | 5173  |        | C | A  | polymorphism | 977007 | 976586 | 99.9444 | -     | L-M |
|        | 6569  | COX1   | A | AG | polymorphism | 625743 | 577879 | 92.3359 | 1-ins | -   |
|        | 6570  |        | A | AG | polymorphism | 625844 | 577879 | 92.3359 | 1-ins | -   |
|        | 8014  | COX2   | G | A  | polymorphism | 856617 | 856501 | 99.9756 | -     | -   |
|        | 8399  | ATP8   | C | T  | polymorphism | 908491 | 908348 | 99.9711 | -     | L-F |
|        | 8435  |        | T | C  | polymorphism | 863569 | 863464 | 99.9763 | -     | -   |
|        | 8569  | ATP6   | A | G  | polymorphism | 653775 | 653506 | 99.944  | -     | -   |
|        | 8686  |        | A | G  | polymorphism | 910866 | 910715 | 99.9648 | -     | T-A |
|        | 8769  |        | G | A  | polymorphism | 872371 | 872274 | 99.9846 | -     | -   |
|        | 8814  |        | T | C  | polymorphism | 831673 | 831601 | 99.9752 | -     | -   |
|        | 9935  | COX3   | C | T  | polymorphism | 988570 | 988431 | 99.9763 | -     | -   |
|        | 10166 | ND3    | C | T  | polymorphism | 964873 | 964676 | 99.9645 | -     | -   |
|        | 10385 |        | C | T  | polymorphism | 989721 | 989562 | 99.9765 | -     | -   |
|        | 10858 | ND4    | T | C  | polymorphism | 882227 | 882032 | 99.9095 | -     | -   |
|        | 11131 |        | T | C  | polymorphism | 988894 | 988761 | 99.9278 | -     | -   |
|        | 11899 |        | A | G  | polymorphism | 992936 | 991561 | 99.8542 | -     | -   |
|        | 12177 | TRNH   | A | G  | polymorphism | 990454 | 990172 | 99.9582 | -     | -   |
|        | 12346 | ND5    | G | A  | polymorphism | 985959 | 985817 | 99.9788 | -     | -   |
|        | 12690 |        | C | T  | polymorphism | 988911 | 988692 | 99.9633 | -     | -   |

|       |        |   |   |              |        |        |         |   |     |
|-------|--------|---|---|--------------|--------|--------|---------|---|-----|
| 13812 |        | A | G | polymorphism | 996116 | 995899 | 99.965  | - | -   |
| 14076 |        | A | G | polymorphism | 993980 | 993813 | 99.969  | - | -   |
| 14165 | ND6    | T | C | polymorphism | 995551 | 995383 | 99.969  | - | Y-C |
| 14455 |        | C | T | polymorphism | 993200 | 993010 | 99.9669 | - | -   |
| 14653 |        | C | T | polymorphism | 990390 | 990282 | 99.9751 | - | -   |
| 14751 | CYTB   | C | T | polymorphism | 989931 | 989806 | 99.9799 | - | T-I |
| 14768 |        | T | C | polymorphism | 992970 | 992893 | 99.9788 | - | -   |
| 14912 |        | A | G | polymorphism | 990606 | 990300 | 99.9538 | - | T-A |
| 15028 |        | G | A | polymorphism | 985795 | 985681 | 99.9844 | - | -   |
| 15202 |        | G | A | polymorphism | 823110 | 822980 | 99.9803 | - | -   |
| 15208 |        | T | C | polymorphism | 849230 | 849109 | 99.97   | - | -   |
| 15286 |        | G | A | polymorphism | 989654 | 989514 | 99.9807 | - | -   |
| 15425 |        | T | C | polymorphism | 988911 | 988778 | 99.9433 | - | -   |
| 15493 |        | T | C | polymorphism | 978494 | 978373 | 99.9761 | - | -   |
| 15647 |        | G | A | polymorphism | 981377 | 981274 | 99.9798 | - | I-V |
| 15790 |        | A | G | polymorphism | 985755 | 985560 | 99.9431 | - | I-V |
| 15836 |        | G | A | polymorphism | 966041 | 965932 | 99.9854 | - | -   |
| 15912 | TRNT   | A | G | polymorphism | 991096 | 990847 | 99.9208 | - | -   |
| 15936 |        | A | G | polymorphism | 990670 | 990286 | 99.9497 | - | -   |
| 16125 | D-loop | C | T | polymorphism | 436189 | 436141 | 99.9819 | - | -   |
| 16228 |        | C | T | polymorphism | 856600 | 856249 | 99.9505 | - | -   |
| 16250 |        | G | A | polymorphism | 998999 | 998821 | 99.9791 | - | -   |
| 16303 |        | T | A | polymorphism | 818137 | 818035 | 99.9808 | - | -   |
| 16347 |        | T | C | polymorphism | 999105 | 998946 | 99.9705 | - | -   |
| 16504 |        | C | T | polymorphism | 621330 | 621163 | 99.9625 | - | -   |

total numbers of alterations

56

|        |      |        |   |    |              |        |        |         |       |     |
|--------|------|--------|---|----|--------------|--------|--------|---------|-------|-----|
| TIG120 | 103  | D-loop | A | G  | polymorphism | 929806 | 929498 | 99.9568 | -     | -   |
| (6y)   | 194  |        | C | T  | polymorphism | 10159  | 10066  | 99.0255 | -     | -   |
|        | 204  |        | C | T  | polymorphism | 165091 | 164897 | 99.8728 | -     | -   |
|        | 207  |        | G | A  | polymorphism | 205408 | 205156 | 99.8569 | -     | -   |
|        | 488  |        | T | C  | polymorphism | 648509 | 648416 | 99.9685 | -     | -   |
|        | 706  | RNR1   | A | G  | polymorphism | 978925 | 978195 | 99.9152 | -     | -   |
|        | 951  |        | C | CA | polymorphism | 999326 | 948397 | 94.9037 | 1-ins | -   |
|        | 1594 |        | A | G  | polymorphism | 987571 | 987333 | 99.9611 | -     | -   |
|        | 2762 | RNR2   | C | T  | polymorphism | 995461 | 898728 | 90.2742 | -     | -   |
|        | 3006 |        | G | A  | polymorphism | 989846 | 989678 | 99.9715 | -     | -   |
|        | 3386 | ND1    | G | A  | polymorphism | 705795 | 705683 | 99.9751 | -     | -   |
|        | 5173 | ND2    | C | A  | polymorphism | 949650 | 949386 | 99.9615 | -     | L-M |
|        | 5257 |        | G | A  | polymorphism | 788823 | 788526 | 99.9539 | -     | A-T |
|        | 6570 | COX1   | A | AG | polymorphism | 233902 | 214724 | 91.8008 | 1-ins | -   |
|        | 6713 |        | T | C  | polymorphism | 316024 | 315686 | 99.8744 | -     | -   |

|       |        |   |   |              |        |        |         |   |     |
|-------|--------|---|---|--------------|--------|--------|---------|---|-----|
| 8399  | ATP8   | C | T | polymorphism | 872684 | 872515 | 99.9695 | - | -   |
| 8569  | ATP6   | A | G | polymorphism | 550502 | 550227 | 99.9321 | - | -   |
| 8686  |        | A | G | polymorphism | 936514 | 936378 | 99.9676 | - | T-A |
| 8769  |        | G | A | polymorphism | 818207 | 818114 | 99.9852 | - | -   |
| 8814  |        | T | C | polymorphism | 736098 | 736030 | 99.9666 | - | -   |
| 9740  | COX3   | G | A | polymorphism | 989712 | 989609 | 99.9857 | - | -   |
| 9935  |        | C | T | polymorphism | 992238 | 992061 | 99.9713 | - | -   |
| 10385 | ND3    | C | T | polymorphism | 990176 | 990024 | 99.9766 | - | -   |
| 10858 | ND4    | T | C | polymorphism | 875106 | 874895 | 99.936  | - | -   |
| 11131 |        | T | C | polymorphism | 984715 | 984595 | 99.9563 | - | -   |
| 11899 |        | A | G | polymorphism | 992580 | 989768 | 99.7104 | - | -   |
| 12177 | TRNH   | A | G | polymorphism | 990805 | 990554 | 99.9637 | - | -   |
| 12346 | ND5    | G | A | polymorphism | 825073 | 824959 | 99.9778 | - | -   |
| 12690 |        | C | T | polymorphism | 976980 | 976679 | 99.9538 | - | -   |
| 14113 |        | A | G | polymorphism | 983559 | 891780 | 90.6504 | - | T-A |
| 14455 | ND6    | C | T | polymorphism | 868399 | 868243 | 99.9703 | - | -   |
| 14653 |        | C | T | polymorphism | 988564 | 988448 | 99.9769 | - | -   |
| 14751 | CYTB   | C | T | polymorphism | 908569 | 908449 | 99.9799 | - | T-I |
| 14768 |        | T | C | polymorphism | 894998 | 894908 | 99.9773 | - | -   |
| 15028 |        | G | A | polymorphism | 986890 | 986767 | 99.9795 | - | -   |
| 15208 |        | T | C | polymorphism | 995346 | 995221 | 99.9729 | - | -   |
| 15286 |        | G | A | polymorphism | 970827 | 970693 | 99.9795 | - | -   |
| 15493 |        | T | C | polymorphism | 922508 | 922399 | 99.9736 | - | -   |
| 15647 |        | G | A | polymorphism | 986148 | 986048 | 99.9843 | - | I-V |
| 15836 |        | G | A | polymorphism | 990550 | 990428 | 99.9833 | - | I-V |
| 15912 | TRNT   | A | G | polymorphism | 993139 | 992854 | 99.9397 | - | -   |
| 16125 | D-loop | C | T | polymorphism | 432780 | 432739 | 99.9834 | - | -   |
| 16208 |        | T | C | polymorphism | 1311   | 1309   | 99.6949 | - | -   |
| 16228 |        | C | T | polymorphism | 246    | 240    | 97.561  | - | -   |
| 16230 |        | C | T | polymorphism | 806    | 802    | 99.3797 | - | -   |
| 16250 |        | G | A | polymorphism | 6104   | 6061   | 99.2628 | - | -   |
| 16303 |        | T | A | polymorphism | 26023  | 25964  | 99.7617 | - | -   |
| 16304 |        | A | G | polymorphism | 39800  | 39579  | 99.407  | - | -   |
| 16347 |        | T | C | polymorphism | 999073 | 998826 | 99.9644 | - | -   |
| 16504 |        | C | T | polymorphism | 599188 | 599037 | 99.97   | - | -   |

total numbers of alterations

50

|        |     |        |   |   |              |        |        |         |   |   |
|--------|-----|--------|---|---|--------------|--------|--------|---------|---|---|
| TIG118 | 103 | D-loop | A | G | polymorphism | 952137 | 951846 | 99.9615 | - | - |
| (12y)  | 152 |        | T | C | polymorphism | 385500 | 385296 | 99.8895 | - | - |
|        | 199 |        | C | T | polymorphism | 592022 | 591878 | 99.9644 | - | - |
|        | 204 |        | C | T | polymorphism | 658146 | 658021 | 99.9745 | - | - |
|        | 488 |        | T | C | polymorphism | 766339 | 766242 | 99.9687 | - | - |

|       |        |   |    |              |        |        |         |       |     |
|-------|--------|---|----|--------------|--------|--------|---------|-------|-----|
| 706   | RNR1   | A | G  | polymorphism | 993751 | 993379 | 99.9544 | -     | -   |
| 951   |        | C | CA | polymorphism | 999397 | 920827 | 92.1383 | 1-ins | -   |
| 1594  |        | A | G  | polymorphism | 986481 | 986233 | 99.9591 | -     | -   |
| 3006  | RNR2   | G | A  | polymorphism | 990826 | 990673 | 99.9785 | -     | -   |
| 3201  |        | C | T  | polymorphism | 995149 | 994624 | 99.9306 | -     | -   |
| 4878  | ND2    | C | T  | polymorphism | 989346 | 946222 | 95.6237 | -     | -   |
| 5173  |        | C | A  | polymorphism | 972540 | 972054 | 99.936  | -     | L-M |
| 6493  | COX1   | C | A  | polymorphism | 536062 | 536007 | 99.9744 | -     | L-I |
| 6570  |        | A | AG | polymorphism | 544580 | 511337 | 93.8957 | 1-ins | -   |
| 8399  | ATP8   | C | T  | polymorphism | 847721 | 847609 | 99.9712 | -     | L-F |
| 8458  |        | T | C  | polymorphism | 746134 | 745328 | 99.8506 | -     | -   |
| 8569  | ATP6   | A | G  | polymorphism | 716878 | 716588 | 99.9382 | -     | -   |
| 8686  |        | A | G  | polymorphism | 971753 | 971595 | 99.9692 | -     | T-A |
| 8769  |        | G | A  | polymorphism | 930365 | 930249 | 99.9815 | -     | -   |
| 8814  |        | T | C  | polymorphism | 889432 | 889360 | 99.9728 | -     | -   |
| 9935  | COX3   | C | T  | polymorphism | 988228 | 988067 | 99.9713 | -     | -   |
| 10385 | ND3    | C | T  | polymorphism | 989552 | 989389 | 99.9759 | -     | -   |
| 10395 | TRNR   | T | C  | polymorphism | 991178 | 991001 | 99.9672 | -     | -   |
| 10858 | ND4    | T | C  | polymorphism | 892005 | 891816 | 99.9434 | -     | -   |
| 11131 |        | T | C  | polymorphism | 987213 | 987083 | 99.9583 | -     | -   |
| 11899 |        | A | G  | polymorphism | 993989 | 992580 | 99.8507 | -     | -   |
| 12177 | TRNH   | A | G  | polymorphism | 990032 | 989773 | 99.965  | -     | -   |
| 12346 | ND5    | G | A  | polymorphism | 978662 | 978536 | 99.9788 | -     | -   |
| 12690 |        | C | T  | polymorphism | 990883 | 990661 | 99.9636 | -     | -   |
| 12960 |        | A | G  | polymorphism | 966667 | 966397 | 99.9605 | -     | -   |
| 14455 | ND6    | C | T  | polymorphism | 967419 | 967243 | 99.9674 | -     | -   |
| 14653 |        | C | T  | polymorphism | 992032 | 991933 | 99.9771 | -     | -   |
| 14751 | CYTB   | C | T  | polymorphism | 946269 | 946131 | 99.9758 | -     | T-I |
| 14768 |        | T | C  | polymorphism | 969862 | 969758 | 99.9748 | -     | -   |
| 14964 |        | T | C  | polymorphism | 990686 | 990530 | 99.9734 | -     | -   |
| 15028 |        | G | A  | polymorphism | 987942 | 987829 | 99.9818 | -     | -   |
| 15208 |        | T | C  | polymorphism | 992262 | 992134 | 99.9726 | -     | -   |
| 15286 |        | G | A  | polymorphism | 991591 | 991458 | 99.9801 | -     | -   |
| 15493 |        | T | C  | polymorphism | 937664 | 937524 | 99.971  | -     | -   |
| 15647 |        | G | A  | polymorphism | 984814 | 984711 | 99.9686 | -     | I-V |
| 15836 |        | G | A  | polymorphism | 992485 | 992348 | 99.9818 | -     | I-V |
| 15912 | TRNT   | A | G  | polymorphism | 991144 | 990862 | 99.9446 | -     | -   |
| 16114 | D-loop | G | A  | polymorphism | 526269 | 526179 | 99.9783 | -     | -   |
| 16125 |        | C | T  | polymorphism | 430486 | 430445 | 99.9856 | -     | -   |
| 16228 |        | C | T  | polymorphism | 591601 | 591408 | 99.9593 | -     | -   |
| 16250 |        | G | A  | polymorphism | 589890 | 589772 | 99.9747 | -     | -   |
| 16303 |        | T | A  | polymorphism | 19550  | 19507  | 99.7749 | -     | -   |



|       |   |   |              |        |        |         |   |   |
|-------|---|---|--------------|--------|--------|---------|---|---|
| 16304 | A | G | polymorphism | 32169  | 31944  | 99.2757 | - | - |
| 16347 | T | C | polymorphism | 999278 | 998936 | 99.9571 | - | - |

total numbers of alterations

49

|        |       |        |   |    |              |        |        |         |       |     |
|--------|-------|--------|---|----|--------------|--------|--------|---------|-------|-----|
| TIG106 | 103   | D-loop | A | G  | polymorphism | 816478 | 816159 | 99.9465 | -     | -   |
| (80y)  | 146   |        | T | C  | polymorphism | 463870 | 463707 | 99.9345 | -     | -   |
|        | 199   |        | C | T  | polymorphism | 102490 | 102396 | 99.8956 | -     | -   |
|        | 204   |        | C | T  | polymorphism | 149846 | 149724 | 99.9092 | -     | -   |
|        | 260   |        | G | A  | polymorphism | 275646 | 275569 | 99.9666 | -     | -   |
|        | 488   |        | T | C  | polymorphism | 579627 | 579544 | 99.966  | -     | -   |
|        | 951   | RNR1   | C | CA | polymorphism | 999712 | 942871 | 94.3143 | 1-ins | -   |
|        | 1594  |        | A | G  | polymorphism | 725287 | 725077 | 99.948  | -     | -   |
|        | 4500  | ND2    | C | T  | polymorphism | 783641 | 783486 | 99.9678 | -     | -   |
|        | 4828  |        | A | G  | polymorphism | 774591 | 774212 | 99.9342 | -     | T-A |
|        | 5103  |        | T | C  | polymorphism | 993185 | 992661 | 99.9177 | -     | -   |
|        | 5596  | TRNA   | C | T  | polymorphism | 903630 | 902900 | 99.9106 | -     | -   |
|        | 6570  | COX1   | A | AG | polymorphism | 613820 | 567272 | 92.4167 | 1-ins | -   |
|        | 6731  |        | A | G  | polymorphism | 711979 | 711256 | 99.8812 | -     | -   |
|        | 7304  |        | T | C  | polymorphism | 944380 | 943966 | 99.9349 | -     | -   |
|        | 7594  | COX2   | G | A  | polymorphism | 988360 | 987901 | 99.9402 | -     | -   |
|        | 8569  | ATP6   | A | G  | polymorphism | 583487 | 583225 | 99.9366 | -     | -   |
|        | 8686  |        | A | G  | polymorphism | 794123 | 793979 | 99.9611 | -     | T-A |
|        | 8769  |        | G | A  | polymorphism | 740110 | 740024 | 99.9793 | -     | -   |
|        | 8814  |        | T | C  | polymorphism | 707633 | 707557 | 99.9634 | -     | -   |
|        | 9080  |        | T | C  | polymorphism | 733666 | 733576 | 99.9568 | -     | L-P |
|        | 9150  |        | T | C  | polymorphism | 766626 | 766545 | 99.9696 | -     | -   |
|        | 9362  | COX3   | A | G  | polymorphism | 991057 | 990918 | 99.9764 | -     | -   |
|        | 9560  |        | G | A  | polymorphism | 992242 | 992109 | 99.9719 | -     | -   |
|        | 9935  |        | C | T  | polymorphism | 841928 | 841773 | 99.968  | -     | -   |
|        | 10385 | ND3    | C | T  | polymorphism | 851737 | 851548 | 99.9668 | -     | -   |
|        | 10858 | ND4    | T | C  | polymorphism | 807345 | 807186 | 99.9482 | -     | -   |
|        | 11131 |        | T | C  | polymorphism | 857807 | 857657 | 99.957  | -     | -   |
|        | 11899 |        | A | G  | polymorphism | 994752 | 993948 | 99.9054 | -     | -   |
|        | 12177 | TRNH   | A | G  | polymorphism | 864733 | 864466 | 99.9503 | -     | -   |
|        | 12296 | TRNL2  | T | C  | polymorphism | 791740 | 791453 | 99.9476 | -     | -   |
|        | 12346 | ND5    | G | A  | polymorphism | 751729 | 751636 | 99.9721 | -     | -   |
|        | 12690 |        | C | T  | polymorphism | 875624 | 875431 | 99.9607 | -     | -   |
|        | 13548 |        | A | G  | polymorphism | 991754 | 991538 | 99.9636 | -     | -   |
|        | 14185 | ND6    | T | C  | polymorphism | 742659 | 742519 | 99.9548 | -     | -   |
|        | 14266 |        | C | T  | polymorphism | 719984 | 719856 | 99.9649 | -     | -   |
|        | 14455 |        | C | T  | polymorphism | 673574 | 673428 | 99.9618 | -     | -   |
|        | 14554 |        | G | A  | polymorphism | 746687 | 746598 | 99.9708 | -     | -   |

|       |        |   |   |              |        |        |         |   |     |
|-------|--------|---|---|--------------|--------|--------|---------|---|-----|
| 14751 | CYTB   | C | T | polymorphism | 690636 | 690496 | 99.9625 | - | T-I |
| 14768 |        | T | C | polymorphism | 662813 | 662751 | 99.9673 | - | -   |
| 15028 |        | G | A | polymorphism | 691085 | 690986 | 99.9731 | - | -   |
| 15208 |        | T | C | polymorphism | 723920 | 723801 | 99.9624 | - | -   |
| 15286 |        | G | A | polymorphism | 683504 | 683390 | 99.9706 | - | -   |
| 15493 |        | T | C | polymorphism | 654899 | 654802 | 99.9655 | - | -   |
| 15647 |        | G | A | polymorphism | 990701 | 990596 | 99.9807 | - | I-V |
| 15836 |        | G | A | polymorphism | 994239 | 994128 | 99.9836 | - | I-V |
| 15912 | TRNT   | A | G | polymorphism | 984103 | 983775 | 99.9434 | - | -   |
| 16125 | D-loop | C | T | polymorphism | 480425 | 480357 | 99.969  | - | -   |
| 16228 |        | C | T | polymorphism | 4218   | 4203   | 99.6444 | - | -   |
| 16250 |        | G | A | polymorphism | 1041   | 1041   | 100     | - | -   |
| 16254 |        | A | G | polymorphism | 98     | 93     | 94.898  | - | -   |
| 16263 |        | C | T | polymorphism | 270    | 266    | 98.5185 | - | -   |
| 16303 |        | T | A | polymorphism | 4523   | 4490   | 99.2704 | - | -   |
| 16304 |        | A | G | polymorphism | 12169  | 11987  | 98.4304 | - | -   |
| 16347 |        | T | C | polymorphism | 984763 | 984452 | 99.9572 | - | -   |
| 16504 |        | C | T | polymorphism | 446389 | 446283 | 99.9689 | - | -   |

total numbers of alterations

56

|        |      |        |   |    |              |        |        |         |       |     |
|--------|------|--------|---|----|--------------|--------|--------|---------|-------|-----|
| TIG107 | 103  | D-loop | A | G  | polymorphism | 914198 | 913966 | 99.9638 | -     | -   |
| (81y)  | 150  |        | C | T  | polymorphism | 168807 | 168786 | 99.9727 | -     | -   |
|        | 195  |        | T | C  | polymorphism | 2624   | 2618   | 99.7713 | -     | -   |
|        | 199  |        | C | T  | polymorphism | 223    | 222    | 99.5516 | -     | -   |
|        | 204  |        | C | T  | polymorphism | 208    | 194    | 93.2692 | -     | -   |
|        | 247  |        | G | -  | polymorphism | 65715  | 65700  | 99.9772 | 1-del | -   |
|        | 263  |        | G | A  | polymorphism | 80714  | 80692  | 99.9678 | -     | -   |
|        | 488  |        | T | C  | polymorphism | 858798 | 858666 | 99.9773 | -     | -   |
|        | 706  | RNR1   | A | G  | polymorphism | 991704 | 991388 | 99.9602 | -     | -   |
|        | 951  |        | C | CA | polymorphism | 999422 | 916568 | 91.7098 | 1-ins | -   |
|        | 1594 |        | A | G  | polymorphism | 987856 | 987584 | 99.956  | -     | -   |
|        | 1711 | RNR2   | C | T  | polymorphism | 987941 | 987740 | 99.9692 | -     | -   |
|        | 2222 |        | T | TA | polymorphism | 988722 | 894706 | 90.4912 | 1-ins | -   |
|        | 3547 | ND1    | T | A  | polymorphism | 733857 | 733825 | 99.9823 | -     | -   |
|        | 4710 | ND2    | A | G  | polymorphism | 991538 | 991262 | 99.9618 | -     | -   |
|        | 6021 | COX1   | G | A  | polymorphism | 987711 | 987564 | 99.9766 | -     | -   |
|        | 6570 |        | A | AG | polymorphism | 919139 | 848946 | 92.3632 | 1-ins | -   |
|        | 7190 |        | C | A  | polymorphism | 990863 | 990820 | 99.9701 | -     | -   |
|        | 7993 | COX2   | T | C  | polymorphism | 981318 | 981050 | 99.9608 | -     | -   |
|        | 8686 | ATP6   | A | G  | polymorphism | 985240 | 985079 | 99.9678 | -     | T-A |
|        | 8769 |        | G | A  | polymorphism | 990794 | 990680 | 99.9845 | -     | -   |
|        | 8814 |        | T | C  | polymorphism | 950785 | 950692 | 99.963  | -     | -   |

|       |        |   |   |              |        |        |         |   |     |
|-------|--------|---|---|--------------|--------|--------|---------|---|-----|
| 9530  | COX3   | A | G | polymorphism | 991323 | 990826 | 99.9137 | - | -   |
| 9935  |        | C | T | polymorphism | 988657 | 988517 | 99.9752 | - | -   |
| 10385 | ND3    | C | T | polymorphism | 988787 | 988611 | 99.9745 | - | -   |
| 10858 | ND4    | T | C | polymorphism | 914229 | 914020 | 99.9134 | - | -   |
| 11131 |        | T | C | polymorphism | 987286 | 987164 | 99.9259 | - | -   |
| 11954 |        | G | A | polymorphism | 992085 | 991088 | 99.8913 | - | A-T |
| 12177 | TRNH   | A | G | polymorphism | 988760 | 988429 | 99.9533 | - | -   |
| 12346 | ND5    | G | A | polymorphism | 992565 | 992423 | 99.9796 | - | -   |
| 12657 |        | A | G | polymorphism | 991487 | 991190 | 99.954  | - | -   |
| 12690 |        | C | T | polymorphism | 990382 | 990220 | 99.9739 | - | -   |
| 13248 |        | A | G | polymorphism | 989211 | 989027 | 99.971  | - | -   |
| 14303 | ND6    | T | C | polymorphism | 915461 | 915337 | 99.9737 | - | N-S |
| 14455 |        | C | T | polymorphism | 896809 | 896639 | 99.9671 | - | -   |
| 14751 | CYTB   | C | T | polymorphism | 874050 | 873895 | 99.9753 | - | T-I |
| 14768 |        | T | C | polymorphism | 850599 | 850521 | 99.9757 | - | -   |
| 15028 |        | G | A | polymorphism | 948466 | 948339 | 99.9782 | - | -   |
| 15189 |        | T | C | polymorphism | 898147 | 897997 | 99.9747 | - | I-T |
| 15208 |        | T | C | polymorphism | 902067 | 901954 | 99.9731 | - | -   |
| 15286 |        | G | A | polymorphism | 880085 | 879977 | 99.9788 | - | -   |
| 15472 |        | A | T | polymorphism | 924107 | 923997 | 99.96   | - | -   |
| 15493 |        | T | C | polymorphism | 875167 | 875068 | 99.9771 | - | -   |
| 15647 |        | G | A | polymorphism | 987082 | 986975 | 99.9823 | - | I-V |
| 15836 |        | G | A | polymorphism | 991114 | 991012 | 99.9841 | - | I-V |
| 15912 | TRNT   | A | G | polymorphism | 975845 | 975526 | 99.9065 | - | -   |
| 15953 | TRNP   | T | C | polymorphism | 990124 | 989981 | 99.9755 | - | -   |
| 16114 | D-loop | G | A | polymorphism | 215950 | 215786 | 99.9162 | - | -   |
| 16125 |        | C | T | polymorphism | 76515  | 76446  | 99.8994 | - | -   |
| 16198 |        | G | A | polymorphism | 5562   | 5551   | 99.7663 | - | -   |
| 16228 |        | C | T | polymorphism | 12130  | 12083  | 99.596  | - | -   |
| 16250 |        | G | A | polymorphism | 10896  | 10878  | 99.8348 | - | -   |
| 16283 |        | T | C | polymorphism | 3326   | 3322   | 99.8797 | - | -   |
| 16304 |        | A | G | polymorphism | 14835  | 14771  | 99.4742 | - | -   |
| 16312 |        | C | T | polymorphism | 176163 | 176073 | 99.9319 | - | -   |

total numbers of alterations

55

|        |     |        |   |    |              |        |        |         |       |   |
|--------|-----|--------|---|----|--------------|--------|--------|---------|-------|---|
| TIG101 | 103 | D-loop | A | G  | polymorphism | 283052 | 282960 | 99.9537 | -     | - |
| (86y)  | 152 |        | T | C  | polymorphism | 170256 | 170206 | 99.8485 | -     | - |
|        | 199 |        | C | T  | polymorphism | 48695  | 48644  | 99.8747 | -     | - |
|        | 204 |        | C | T  | polymorphism | 66811  | 66778  | 99.9431 | -     | - |
|        | 488 |        | T | C  | polymorphism | 202962 | 202930 | 99.9665 | -     | - |
|        | 706 | RNR1   | A | G  | polymorphism | 942654 | 942270 | 99.9392 | -     | - |
|        | 951 |        | C | CA | polymorphism | 507197 | 469032 | 92.4753 | 1-ins | - |

|       |        |   |    |              |        |        |         |       |     |
|-------|--------|---|----|--------------|--------|--------|---------|-------|-----|
| 1594  |        | A | G  | polymorphism | 253737 | 253625 | 99.9295 | -     | -   |
| 3006  | RNR2   | G | A  | polymorphism | 451849 | 451787 | 99.9692 | -     | -   |
| 3201  |        | C | T  | polymorphism | 445020 | 444866 | 99.9333 | -     | -   |
| 3526  | ND1    | G | A  | polymorphism | 136938 | 136924 | 99.9744 | -     | -   |
| 5173  | ND2    | C | A  | polymorphism | 638063 | 637929 | 99.969  | -     | L-M |
| 6570  | COX1   | A | AG | polymorphism | 307098 | 283273 | 92.2419 | 1-ins | -   |
| 8281  | TRNK   | A | G  | polymorphism | 168002 | 167866 | 99.4113 | -     | -   |
| 8399  | ATP8   | C | T  | polymorphism | 216663 | 216632 | 99.9557 | -     | L-F |
| 8458  |        | T | C  | polymorphism | 199936 | 199640 | 99.7324 | -     | -   |
| 8569  | ATP6   | A | G  | polymorphism | 167968 | 167884 | 99.9226 | -     | -   |
| 8686  |        | A | G  | polymorphism | 321132 | 321055 | 99.9505 | -     | T-A |
| 8769  |        | G | A  | polymorphism | 259261 | 259222 | 99.9745 | -     | -   |
| 8814  |        | T | C  | polymorphism | 247938 | 247900 | 99.954  | -     | -   |
| 9935  | COX3   | C | T  | polymorphism | 266683 | 266632 | 99.9599 | -     | -   |
| 9990  | TRNG   | A | G  | polymorphism | 218407 | 218372 | 99.9593 | -     | -   |
| 10385 | ND3    | C | T  | polymorphism | 265101 | 265049 | 99.9562 | -     | -   |
| 10858 | ND4    | T | C  | polymorphism | 274332 | 274276 | 99.91   | -     | -   |
| 11131 |        | T | C  | polymorphism | 262648 | 262551 | 99.9014 | -     | -   |
| 11899 |        | A | G  | polymorphism | 453560 | 453151 | 99.8948 | -     | -   |
| 12177 | TRNH   | A | G  | polymorphism | 679774 | 679568 | 99.9498 | -     | -   |
| 12346 | ND5    | G | A  | polymorphism | 242943 | 242909 | 99.9621 | -     | -   |
| 12690 |        | C | T  | polymorphism | 328597 | 328510 | 99.941  | -     | -   |
| 12942 |        | T | C  | polymorphism | 261013 | 260959 | 99.9559 | -     | -   |
| 14455 | ND6    | C | T  | polymorphism | 248949 | 248912 | 99.9671 | -     | -   |
| 14653 |        | C | T  | polymorphism | 291080 | 291035 | 99.956  | -     | -   |
| 14751 | CYTB   | C | T  | polymorphism | 234196 | 234140 | 99.9445 | -     | T-I |
| 14768 |        | T | C  | polymorphism | 227114 | 227090 | 99.9555 | -     | -   |
| 14964 |        | T | C  | polymorphism | 185169 | 185148 | 99.9703 | -     | -   |
| 15028 |        | G | A  | polymorphism | 230819 | 230782 | 99.9536 | -     | -   |
| 15208 |        | T | C  | polymorphism | 247968 | 247927 | 99.9593 | -     | -   |
| 15286 |        | G | A  | polymorphism | 243412 | 243362 | 99.9622 | -     | -   |
| 15493 |        | T | C  | polymorphism | 209571 | 209545 | 99.9709 | -     | -   |
| 15647 |        | G | A  | polymorphism | 904077 | 903996 | 99.9857 | -     | I-V |
| 15836 |        | G | A  | polymorphism | 799137 | 799052 | 99.9687 | -     | I-V |
| 15912 | TRNT   | A | G  | polymorphism | 798799 | 798504 | 99.8937 | -     | -   |
| 16114 | D-loop | G | A  | polymorphism | 334343 | 334241 | 99.9557 | -     | -   |
| 16125 |        | C | T  | polymorphism | 250113 | 250084 | 99.946  | -     | -   |
| 16228 |        | C | T  | polymorphism | 179904 | 179855 | 99.9628 | -     | -   |
| 16250 |        | G | A  | polymorphism | 179619 | 179592 | 99.9755 | -     | -   |
| 16303 |        | T | A  | polymorphism | 7719   | 7699   | 99.715  | -     | -   |
| 16304 |        | A | G  | polymorphism | 11603  | 11533  | 99.2933 | -     | -   |
| 16347 |        | T | C  | polymorphism | 279298 | 279210 | 99.9549 | -     | -   |

## total numbers of alterations

49

|        |       |        |   |    |              |        |        |         |       |     |
|--------|-------|--------|---|----|--------------|--------|--------|---------|-------|-----|
| TIG102 | 93    | D-loop | A | G  | polymorphism | 870939 | 870779 | 99.9623 | -     | -   |
| (97y)  | 103   |        | A | G  | polymorphism | 929201 | 928888 | 99.9498 | -     | -   |
|        | 199   |        | C | T  | polymorphism | 105068 | 104972 | 99.8515 | -     | -   |
|        | 204   |        | C | T  | polymorphism | 108160 | 108019 | 99.8567 | -     | -   |
|        | 210   |        | A | G  | polymorphism | 119267 | 109256 | 91.535  | -     | -   |
|        | 951   | RNR1   | C | CA | polymorphism | 999572 | 940299 | 94.0702 | 1-ins | -   |
|        | 1594  |        | A | G  | polymorphism | 890317 | 890072 | 99.9513 | -     | -   |
|        | 3532  | ND1    | A | G  | polymorphism | 479494 | 479349 | 99.9531 | -     | -   |
|        | 6570  | COX1   | A | AG | polymorphism | 707285 | 653475 | 92.392  | 1-ins | -   |
|        | 7540  | TRND   | T | C  | polymorphism | 988861 | 988761 | 99.9637 | -     | -   |
|        | 7759  | COX2   | A | G  | polymorphism | 839921 | 839820 | 99.9646 | -     | -   |
|        | 8769  | ATP6   | G | A  | polymorphism | 836492 | 836382 | 99.9756 | -     | -   |
|        | 8814  |        | T | C  | polymorphism | 789420 | 789329 | 99.9683 | -     | -   |
|        | 9525  | COX3   | C | T  | polymorphism | 905941 | 905772 | 99.9673 | -     | -   |
|        | 9947  |        | G | A  | polymorphism | 925975 | 925892 | 99.9732 | -     | -   |
|        | 11131 | ND4    | T | C  | polymorphism | 43669  | 43526  | 99.5008 | -     | -   |
|        | 11134 |        | G | A  | polymorphism | 41513  | 41367  | 99.5688 | -     | -   |
|        | 11136 |        | C | T  | polymorphism | 38692  | 38526  | 99.5296 | -     | -   |
|        | 11899 |        | A | G  | polymorphism | 994266 | 993519 | 99.9148 | -     | -   |
|        | 12177 | TRNH   | A | G  | polymorphism | 942103 | 941832 | 99.9532 | -     | -   |
|        | 12219 | TRNS2  | A | G  | polymorphism | 963701 | 895981 | 92.9587 | -     | -   |
|        | 12346 | ND5    | G | A  | polymorphism | 872463 | 872339 | 99.9713 | -     | -   |
|        | 14134 | ND6    | C | T  | polymorphism | 805200 | 805111 | 99.9769 | -     | -   |
|        | 14143 |        | C | T  | polymorphism | 804561 | 804411 | 99.9657 | -     | -   |
|        | 14455 |        | C | T  | polymorphism | 745795 | 745653 | 99.9635 | -     | -   |
|        | 14653 |        | C | T  | polymorphism | 832364 | 832251 | 99.9686 | -     | -   |
|        | 14751 | CYTB   | C | T  | polymorphism | 795565 | 795374 | 99.9608 | -     | T-I |
|        | 15208 |        | T | C  | polymorphism | 798289 | 798161 | 99.9648 | -     | -   |
|        | 15220 |        | A | G  | polymorphism | 778614 | 778488 | 99.9619 | -     | -   |
|        | 15493 |        | T | C  | polymorphism | 745753 | 745622 | 99.9611 | -     | -   |
|        | 15647 |        | G | A  | polymorphism | 988702 | 988595 | 99.9777 | -     | I-V |
|        | 15836 |        | G | A  | polymorphism | 993822 | 993703 | 99.9792 | -     | I-V |
|        | 15912 | TRNT   | A | G  | polymorphism | 981449 | 981076 | 99.9355 | -     | -   |
|        | 16114 | D-loop | G | A  | polymorphism | 563847 | 563768 | 99.9796 | -     | -   |
|        | 16208 |        | T | C  | polymorphism | 1806   | 1804   | 99.8893 | -     | -   |
|        | 16228 |        | C | T  | polymorphism | 1052   | 1047   | 99.4297 | -     | -   |
|        | 16241 |        | C | T  | polymorphism | 3      | 3      | 100     | -     | -   |
|        | 16250 |        | G | A  | polymorphism | 737    | 737    | 100     | -     | -   |
|        | 16251 |        | C | A  | polymorphism | 846    | 795    | 93.9716 | -     | -   |
|        | 16303 |        | T | A  | polymorphism | 800543 | 800403 | 99.9653 | -     | -   |

16304

A

G

polymorphism

810834

810554

99.945

-

-

---

total numbers of alterations

41

---

<sup>a</sup>Registered under GenBank accession no. AB055387. <sup>b</sup>All of the mutations existing in more than 90% of mtDNA were polymorphic ones that have been reported in normal human subjects.

Table S2. Primers used for PCR and mtDNA sequencing.

| Primer       | Primer sequence (5'-3')   | Primer binding | Fragment size (bp) |
|--------------|---------------------------|----------------|--------------------|
| Primer-1 for | AAATGTTTAGACGGGCTCACATCA  | 610            | 2744               |
| Primer-1 rev | CCATTGCGATTAGAATGGGTACAA  | 3353           |                    |
| Primer-2 for | ACCTAACAAACCCACAGGTCCTAA  | 2756           | 2879               |
| Primer-2 rev | TAAAGTGCTGATTTGCGTTCAGT   | 5634           |                    |
| Primer-3 for | AAAAACTAGCCCCATCTCAATCA   | 4865           | 2840               |
| Primer-3 rev | AGGGCATA CAGGACTAGGAAGCAG | 7704           |                    |
| Primer-4 for | GTGGCCTGACTGGCATTGTATTAG  | 6949           | 2905               |
| Primer-4 rev | CGGATGAAGCAGATAGTGAGGAAA  | 9853           |                    |
| Primer-5 for | AGCCATGTGATTTCACTTCCACTC  | 9284           | 2941               |
| Primer-5 rev | GGGCATGAGTTAGCAGTTCTTGTG  | 12224          |                    |
| Primer-6 for | TCAGCCACATAGCCCTCGTAGTAA  | 11616          | 2501               |
| Primer-6 rev | GGGTTAGGATGAGTGGGAAGAAGA  | 14116          |                    |
| Primer-7 for | CTCCAAAGACCACATCATCGAAAC  | 13491          | 2937               |
| Primer-7 rev | GTAGCACTCTTGTGCGGGATATTG  | 16427          |                    |
| Primer-8 for | GCGTCCTTGCCCTATTACTATCCA  | 15600          | 2256               |
| Primer-8 rev | TGCGCTTACTTTGTAGCCTTCATC  | 1301           |                    |

Table S3. Primers used for Real-time quantitative PCR.

| Gene                                                        | Symbol  | Primer sequence (5'-3')                               |
|-------------------------------------------------------------|---------|-------------------------------------------------------|
| <i>aldehyde dehydrogenase 5 family, member A1</i>           | ALDH5A1 | F AGACCATCCTGGCTAACACG<br>R GGAGTCTCGCTCTGTCATCC      |
| <i>caprin family member 2</i>                               | CAPRIN2 | F CGAATGTGTTTCCCAGACCT<br>R TTGGGAATAAGGTGCTCCAG      |
| <i>cytochrome c oxidase subunit VIIa polypeptide 1</i>      | COX7A1  | F CGCTTTCAGAACCGAGTGC<br>R CCCAGCCAAGGGAGTACAAG       |
| <i>enoyl-CoA, hydratase/3-hydroxyacyl CoA dehydrogenase</i> | EHHADH  | F CAGCTTCTCCCCAGACTCAC<br>R TGAATTGGCTTGTTGCAGAG      |
| <i>glycine C-acetyltransferase</i>                          | GCAT    | F TCTCGCATGGCGGATGA<br>R GCAGCGGTCAATGTCTTCCT         |
| <i>mitochondrial ribosomal protein L28</i>                  | MRPL28  | F ATGCCAACAACGACAAGCTCT<br>R CTGTAGAACTCTCGCTCAAACAGC |
| <i>serine hydroxymethyltransferase 2</i>                    | SHMT2   | F AGTCTATGCCCTATAAGCTCAACCC<br>R GCCGGAAAAGTCGAGCAGT  |
| <i>ubiquitin C</i>                                          | UBC     | F TGGAGCCGAGTGACACCATT<br>R TCAGCGAGGGTACGACCATCTTC   |
